# Supplementary material for: Sex-Dependent Lipid Profile Differences in Skin Mucus between Non-Parental and Parental Discus Fish (Symphysodon haraldi) Determined by Lipidomics
Source: MDPI journal article supplement (doi:10.3390/fishes9010027), 2024-01-07
Supplement: s1 [file s1]

## Supporting Information

### Text S1. HPLC conditions

The sample extracts were analyzed using an LC-ESI-MS/MS system (UPLC, ExionLC AD, <https://sciex.com.cn/> ; MS, QTRAP® 6500+ System, <https://sciex.com/> ). The analytical conditions were as follows, UPLC: column, Thermo Accucore™C30 (2.6 μm, 2.1 mm×100 mm i.d.); solvent system, A: acetonitrile/water (60/40,V/V, 0.1% formic acid, 10 mmol/L ammonium formate), B: acetonitrile/isopropanol (10/90 VV/V, 0.1% formic acid, 10 mmol/L ammonium formate); gradient program, A/B (80:20, V/V) at 0 min, 70:30 V/V at 2.0 min, 40:60 V/V at 4 min, 15:85 V/V at 9 min, 10:90 V/V at 14 min, 5:95 V/V at 15.5 min, 5:95 V/V at 17.3 min, 80:20 V/V at 17.3 min, 80:20 V/V at 20 min; flow rate, 0.35 ml/min; temperature, 45°C; injection volume: 2 μL. The effluent was alternatively connected to an ESI-triple quadrupole-linear ion trap (QTRAP)-MS.

## **Text S2. ESI-Q TRAP-MS/MS conditions**

LIT and triple quadrupole (QQQ) scans were acquired on a triple quadrupole-linear ion trap mass spectrometer (QTRAP), QTRAP® 6500+ LC-MS/MS System, equipped with an ESI Turbo Ion-Spray interface, operating in positive and negative ion mode and controlled by Analyst 1.6.3 software (Sciex). The ESI source operation parameters were as follows: ion source, turbo spray; source temperature 500 °C; ion spray voltage (IS) 5500 V (Positive) , -4500 V(Negative); Ion source gas 1 (GS1), gas 2 (GS2), curtain gas (CUR) were set at 45, 55, and 35 psi, respectively. Instrument tuning and mass calibration were performed with 10 and 100 µmol/L polypropylene glycol solutions in QQQ and LIT modes, respectively. QQQ scans were acquired as MRM experiments with collision gas (nitrogen) set to 5 psi. DP and CE for individual MRM transitions was done with further DP and CE optimization. A specific set of MRM transitions were monitored for each period according to the metabolites eluted within this period.

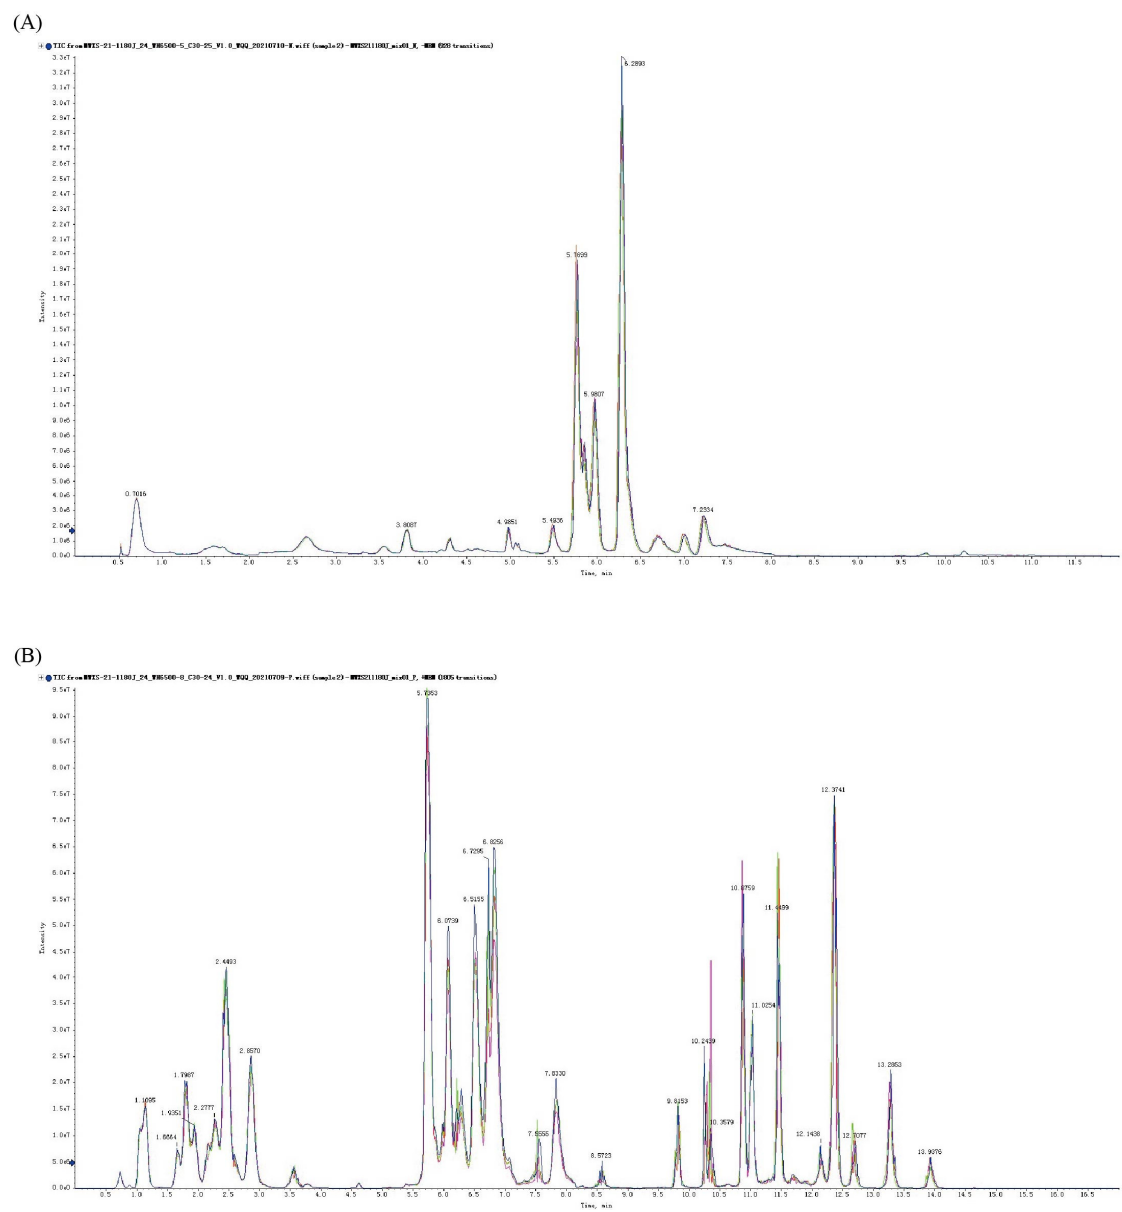

**Figure. S1.** Total ion chromatograms (TICs) of lipids in discus fish skin mucus. Positive ion mode (A). Negative ion mode (B).

(A)

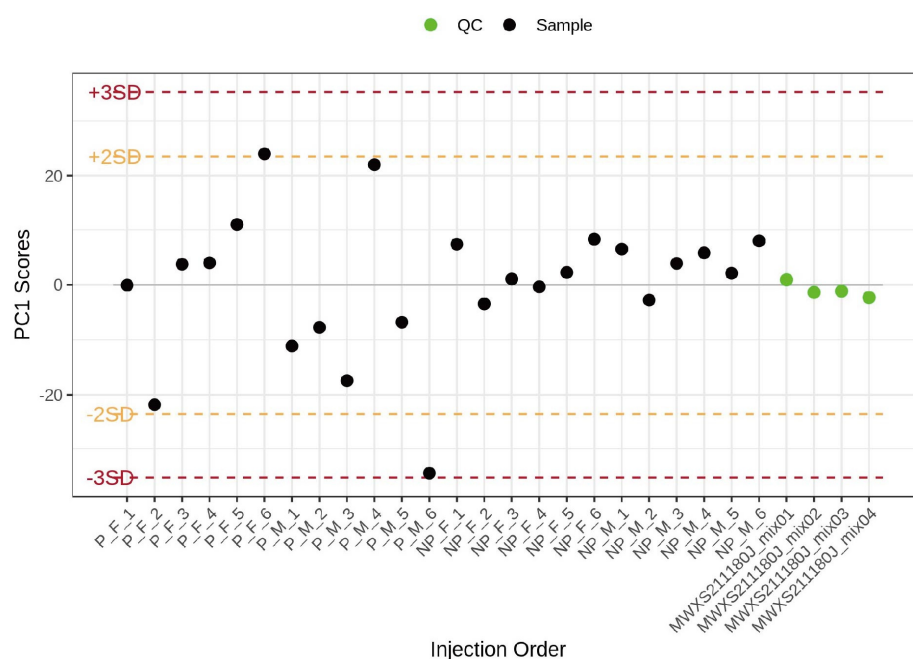

(B)

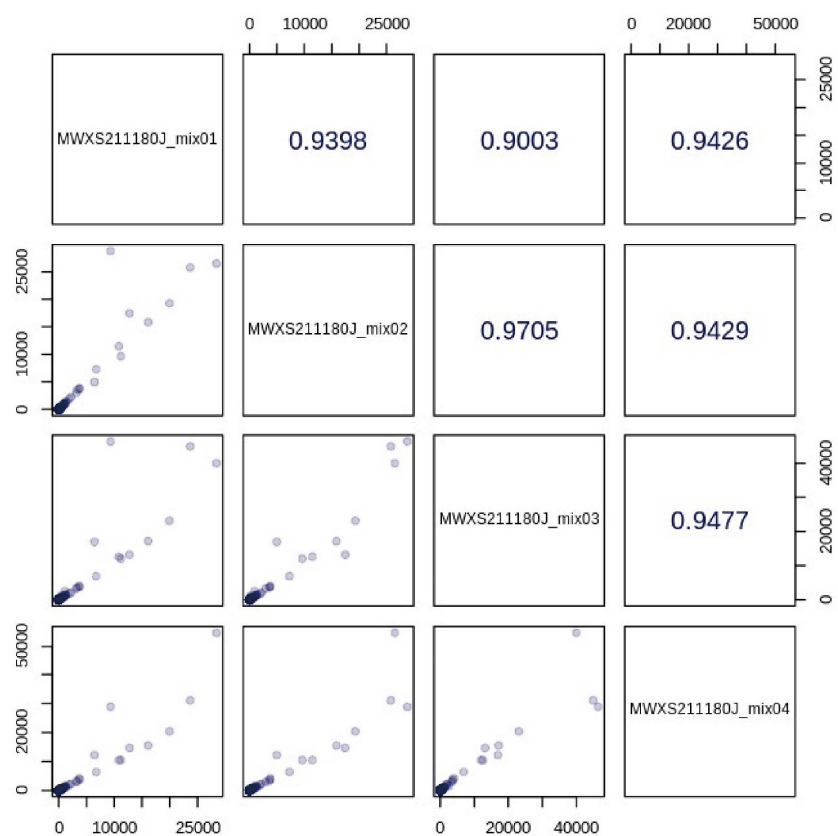

**Figure. S2.** Reliability of the analytical methods. PCA-X score plots of QC samples (A). Correlation of QC samples (B).

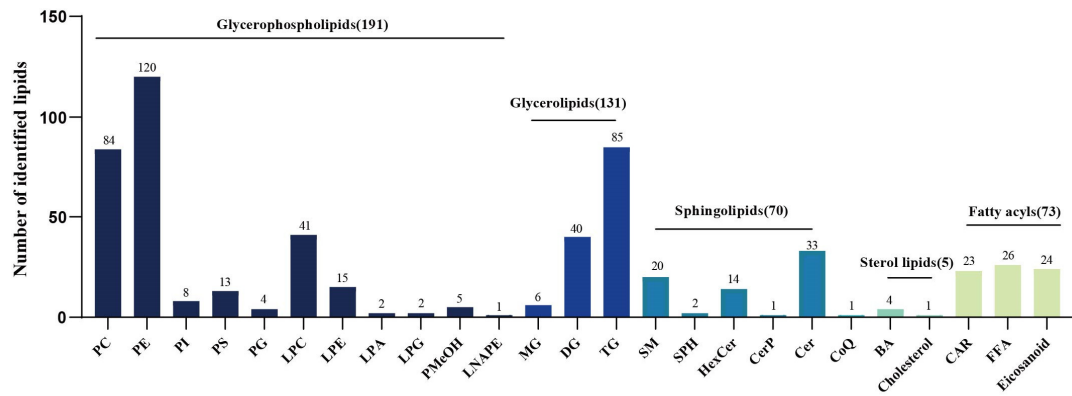

**Figure. S3.** The lipid subclasses identified in the skin mucus of discus fish and the number of each subclass.

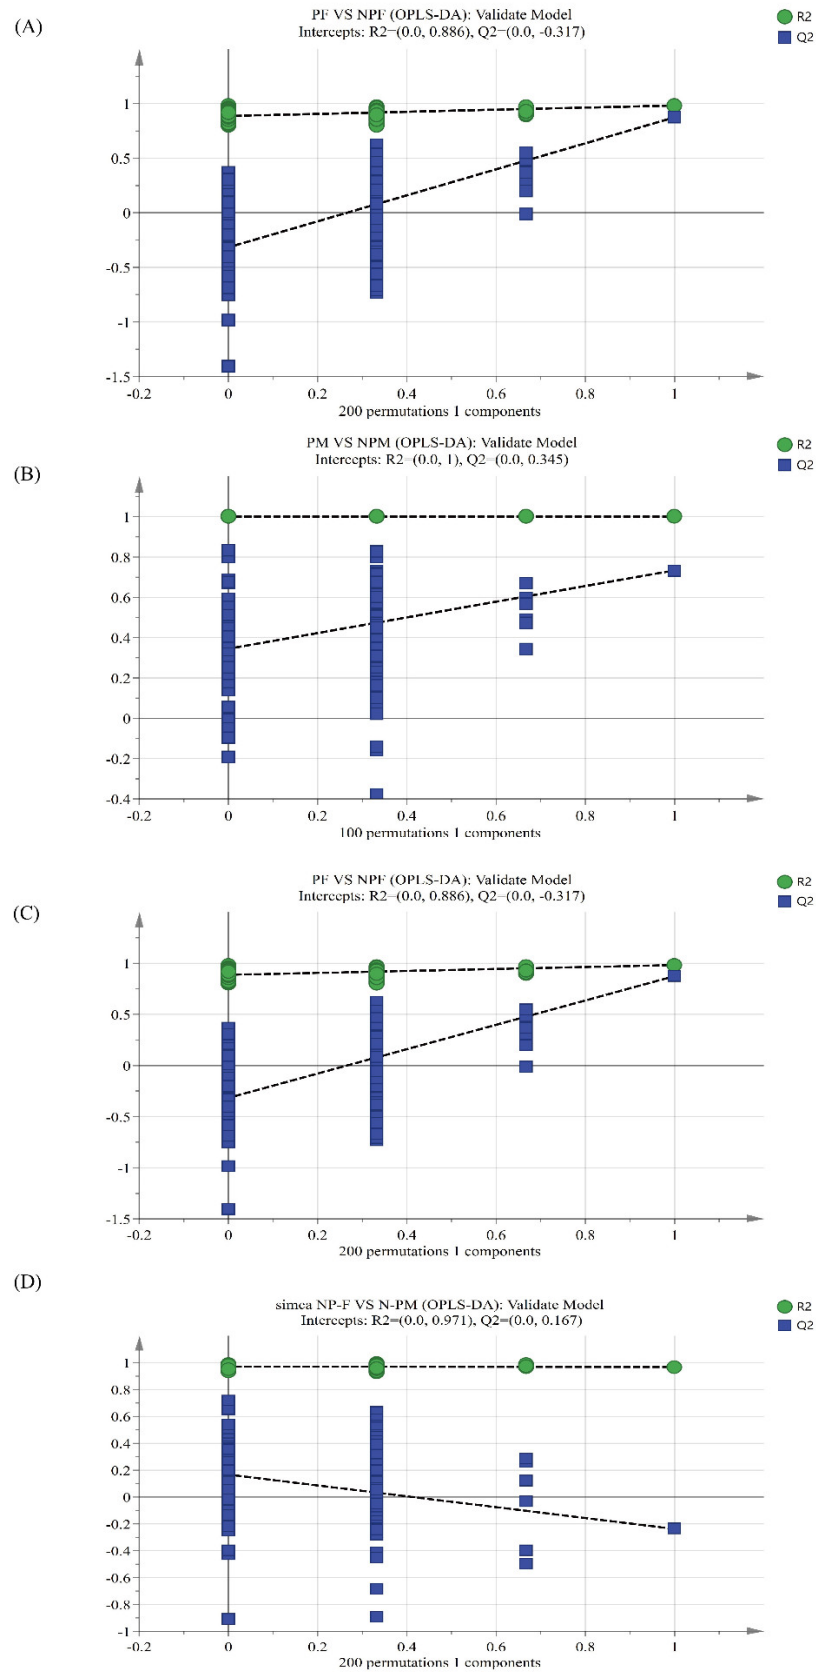

**Figure S4.**Validation by OPLS-DA of of NP-F and P-F, NP-M and P-M samples(A-D).
